# Supplementary material
Source: publisher site journal article supplement (https://www.dovepress.com/article/419822)
Supplement: Supplementary file 1 [file get_supplementary_file.php]

**Appendix**

**Appendix A** The semi-structured interview outline

| **Questions** |
| --- |
| 1. What do you consider as the efforts made by teachers in their daily work? Are there any situations of overcommitment? What are the reasons that prompt you to make efforts in your work? |
| 1. What is the reward for your work? Do you think that teaching requires rewards? Why or why not? |
| 1. Can you recall any situations of imbalance between the efforts made and the rewards received in your work? Please provide examples of situations and the frequency of each situation in a typical week. |
| 1. What causes this imbalance? What factors can affect this imbalance? |
| 1. How do you feel or experience emotionally when facing the imbalance between effort and reward? What impact does it have on your work and life? What factors can make a difference in the emotional experience of the imbalance? |
| 1. How can we avoid the imbalance between effort and reward? |
| 1. How can we improve the negative effects of the inevitable imbalance between effort and reward? |
| 1. Do you think these questions can cover the basic phenomenon of effort-reward imbalance in daily work? Is there anything to add? |
